# Supplementary material
Source: PubMed Central journal article supplement (PMC2893298)
Supplement: NIHMS107733-supplement-Suppl.pdf [file NIHMS107733-supplement-Suppl.pdf]

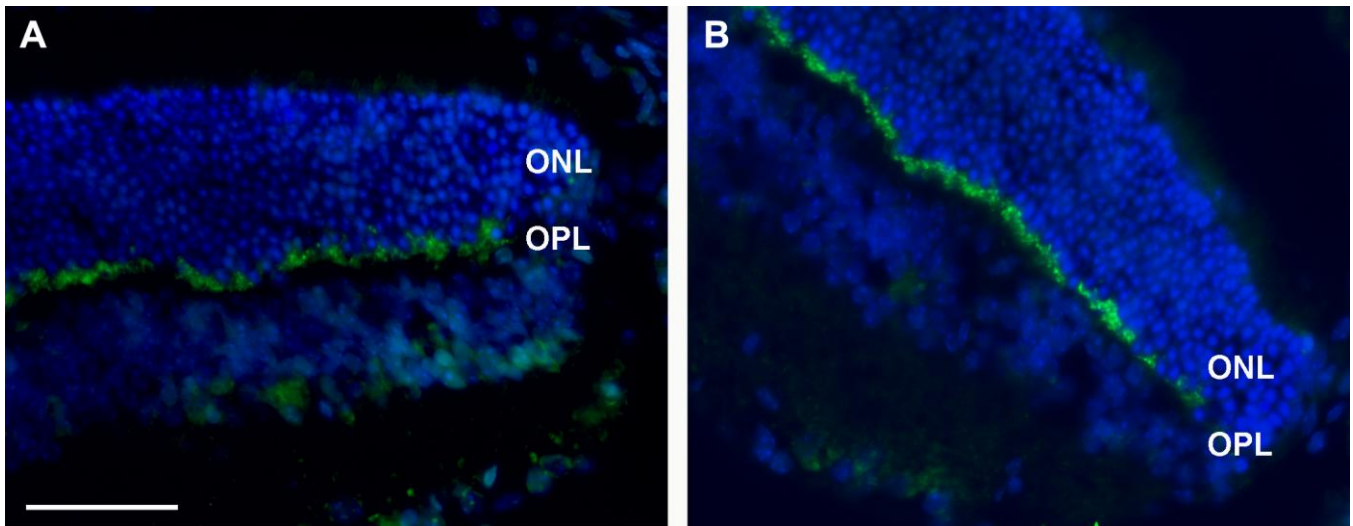

**SUPPLEMENTARY FIGURE S1.** Immunofluorescence images of cryosections of WT (A) and dfcr (B) retinas labeled with a monoclonal antibody against synaptophysin (mAb SVP38) (green). The sections have also been labeled with DAPI to show nuclei. Photoreceptor cell nuclei are above the synaptophysin labeling. ONL, outer nuclear layer (i.e. photoreceptor nuclear layer); OPL, outer plexiform layer (i.e. photoreceptor synaptic layer). A and B are the same magnification; scale bar = 50  $\mu\text{m}$ .
